# Supplementary material
Source: publisher figshare collection journal article supplement (https://tandf.figshare.com/ndownloader/files/18006539)
Supplement: Supplementary file 1 [file 18006539]

**Table S-1 System suitability parameters, linearity parameters, LODs and LOQs for fourteen analytes (n=6)**

| Analyte | Theor. Plate | Asym. factor | Resolution | Linear equation | Linear Range  / mg﹒L-1 | r | LOD  / mg﹒L-1 | LOQ  / mg﹒L-1 |
| --- | --- | --- | --- | --- | --- | --- | --- | --- |
| MF | 414586 | 1.29 | - | Y = 23217x+42 | 20.04-501.0 | 1.000 | 0.050 | 0.100 |
| BF | 515507 | 1.09 | 22.82 | Y = 20582x-0.11 | 19.28-482.0 | 1.000 | 0.048 | 0.144 |
| PHF | 532631 | 0.81 | 19.07 | Y =18990x+16 | 19.92-498.0 | 1.000 | 0.100 | 0.199 |
| RGZ | 433841 | 0.70 | 16.60 | Y=12762x+2.5 | 19.39-484.8 | 1.000 | 0.097 | 0.194 |
| PGZ | 363798 | 1.14 | 20.12 | Y = 8012x+3.8 | 18.82-470.4 | 1.000 | 0.188 | 0.376 |
| CPM | 368206 | 0.98 | 10.74 | Y = 17642x+3.4 | 18.71-467.7 | 1.000 | 0.094 | 0.187 |
| GPZ | 438064 | 0.98 | 5.55 | Y = 13373x+13 | 22.30-557.5 | 1.000 | 0.112 | 0.223 |
| TBM | 417269 | 0.98 | 3.91 | Y =12872x+9.0 | 21.48-537.0 | 1.000 | 0.107 | 0.215 |
| GCZ | 435085 | 0.99 | 16.84 | Y = 5042x+8.1 | 21.44-536.0 | 0.9999 | 0.214 | 0.429 |
| GBM | 555443 | 1.01 | 17.06 | Y = 15633x+43 | 21.48-537.0 | 1.000 | 0.107 | 0.215 |
| GMR | 579860 | 0.98 | 4.19 | Y = 15832x-4.3 | 19.95-49.88 | 1.000 | 0.100 | 0.200 |
| RGN | 317593 | 1.23 | 9.07 | Y = 6746x+4.8 | 21.60-540.0 | 1.000 | 0.216 | 0.432 |
| GQD | 646094 | 0.98 | 4.03 | Y = 15476x+18 | 20.58-514.5 | 1.000 | 0.103 | 0.206 |
| NGN | 519733 | 1.01 | 4.23 | Y =9217x+37 | 18.86-471.4 | 1.000 | 0.189 | 0.377 |

**Table S-2 Recovery, precision and stability data for fourteen analytes from hard capsule samples (n=6)**

| Analyte | 20 mg˙L-1 of standard spiked | | | | 100 mg˙L-1 of standard spiked | | | | 500 mg˙L-1 of standard spiked | | | |
| --- | --- | --- | --- | --- | --- | --- | --- | --- | --- | --- | --- | --- |
| Recovery  /% | Precision/%R.S.D.  (intra-day/inter-day) | | Stability  /%R.S.D. | Recovery  /% | Precision/%R.S.D.  (intra-day/inter-day) | | Stability  /%R.S.D. | Recovery  /% | Precision/%R.S.D.  (intra-day/inter-day) | | Stability  /%R.S.D. |
| Instrumental | Repeatability | Instrumental | Repeatability | Instrumental | Repeatability |
| MF | 101.4 | 0.35(0.11)*/  0.50(0.20)* | 0.70(0.12)* /  1.30(0.17)* | 0.35(0.15) | 101.0 | 0.14(0.17) /  0.33(0.20) | 0.46(0.17) /  0.97(0.18) | 0.21(0.18) | 102.2 | 0.12(0.16) /  0.32(0.15) | 0.65(0.15) /  0.89(0.17) | 0.13(0.16) |
| BF | 102.6 | 0.78(0.13)/  0.98(0.14) | 0.97(0.13)/  1.36(0.15) | 1.23(0.12) | 101.5 | 0.67(0.12) /  0.85(0.10) | 0.60(0.12) /  0.99(0.14) | 1.05(0.10) | 100.7 | 0.85(0.11) /  0.98(0.10) | 0.73(0.12) /  1.33(0.11) | 0.96(0.12) |
| PHF | 99.33 | 0.19(0.09)/  0.46(0.10) | 0.60(0.10)/  0.70(0.10) | 0.23(0.11) | 101.2 | 0.11(0.09) /  0.24(0.09) | 0.47(0.10) /  0.70(0.08) | 0.21(0.10) | 100.1 | 0.10(0.09) /  0.12(0.17) | 0.12(0.10) /  0.63(0.13) | 0.20(0.11) |
| RGZ | 101.0 | 0.33(0.08)/  0.45(0.09) | 0.52(0.07)/  0.81 (0.08) | 0.30(0.06) | 99.32 | 0.23(0.06) /  0.46(0.07) | 0.48(0.06) /  0.59(0.07) | 0.21(0.06) | 101.3 | 0.13(0.05) /  0.19(0.06) | 0.29(0.07) /  0.70 (0.06) | 0.22(0.06) |
| PGZ | 99.72 | 0.40(0.10)/  0.62(0.10) | 0.44(0.08)/  0.87(0.10) | 0.37(0.09) | 100.7 | 0.22(0.10) /  0.34(0.09) | 0.50(0.09) /  0.54(0.09) | 0.18(0.09) | 100.2 | 0.20(0.08) /  0.52(0.09) | 0.59(0.09) /  0.73(0.08) | 0.11(0.09) |
| CPM | 101.0 | 0.21(0.07)/  0.29(0.07) | 0.30(0.07)/  0.80(0.08) | 0.21(0.07) | 99.87 | 0.24(0.07) /  0.39(0.07) | 0.36(0.07) /  0.88(0.08) | 0.31(0.07) | 101.4 | 0.27(0.07) /  0.33(0.07) | 0.49(0.07) /  0.65(0.07) | 0.25(0.07) |
| GPZ | 100.6 | 0.18(0.07)/  0.34(0.08) | 0.49(0.07)/  0.76(0.08) | 0.27(0.08) | 100.2 | 0.14(0.07) /  0.28(0.07) | 0.30(0.07) /  0.67(0.08) | 0.21(0.07) | 101.1 | 0.14(0.08) /  0.22(0.08) | 0.43(0.07) /  0.89(0.07) | 0.24(0.08) |
| TBM | 98.97 | 0.23(0.08)/  0.37(0.08) | 0.30(0.08)/  0.79(0.09) | 0.23(0.09) | 99.42 | 0.17(0.08) /  0.28(0.08) | 0.28(0.08) /  0.59(0.09) | 0.18(0.08) | 99.37 | 0.25(0.08) /  0.46(0.08) | 0.33(0.07) /  0.86(0.08) | 0.19(0.08) |
| GCZ | 99.90 | 0.14(0.07)/  0.50(0.09) | 0.38(0.07)  0.68(0.08) | 0.20(0.08) | 100.1 | 0.16(0.09) /  0.43(0.08) | 0.35(0.08) /  0.72(0.09) | 0.19(0.09) | 100.5 | 0.24(0.08) /  0.32(0.07) | 0.30(0.08) /  0.55(0.07) | 0.21(0.07) |
| GBM | 101.4 | 0.13(0.06)/  0.25(0.07) | 0.39(0.05)/  0.42(0.06) | 0.16(0.06) | 100.3 | 0.11(0.06) /  0.19(0.06) | 0.32(0.06) /  0.69(0.07) | 0.17(0.06) | 100.8 | 0.11(0.05) /  0.27(0.06) | 0.32(0.05) /  0.92(0.07) | 0.23(0.06) |
| GMR | 100.9 | 0.19(0.04)/ 0.38(0.06) | 0.46(0.05)/  1.05(0.06) | 0.20(0.05) | 100.4 | 0.21(0.04) /  0.49(0.06) | 0.30(0.05) /  0.42(0.06) | 0.13(0.05) | 99.10 | 0.12(0.05) /  0.30(0.05) | 0.29(0.05) /  0.97(0.07) | 0.18(0.05) |
| RGN | 99.66 | 0.15(0.04)/  0.30(0.05) | 0.32(0.05)/  0.35(0.06) | 0.11(0.05) | 99.24 | 0.11(0.05) /  0.17(0.04) | 0.22(0.04) /  0.30(0.05) | 0.12(0.04) | 98.70 | 0.16(0.05) /  0.21(0.06) | 0.41(0.06) /  0.38(0.06) | 0.14(0.05) |
| GQD | 100.8 | 0.12(0.04)/  0.27(0.06) | 0.32(0.04) /  0.67(0.05) | 0.18(0.04) | 100.0 | 0.12(0.04) /  0.17(0.05) | 0.36(0.04) /  0.64(0.05) | 0.20(0.04) | 99.91 | 0.13(0.04) /  0.24(0.05) | 0.23(0.04) /  0.56(0.04) | 0.12(0.04) |
| NGN | 98.55 | 0.25(0.04) /  0.42(0.05) | 0.60(0.04) /  1.53(0.04) | 0.40(0.04) | 99.20 | 0.25(0.04) /  0.32(0.04) | 0.45(0.05) /  0.98(0.04) | 0.29(0.04) | 101.5 | 0.05(0.04) /  0.35(0.05) | 0.48(0.05) /  0.84(0.05) | 0.23(0.05) |

*Values in brackets are the %R.S.D. values of retention times.

**Table S-3 Recovery, precision and stability data for fourteen analytes from soft capsule samples (n=6)**

| Analyte | 20 mg˙L-1 of standard spiked | | | | 100 mg˙L-1 of standard spiked | | | | 500 mg˙L-1 of standard spiked | | | |
| --- | --- | --- | --- | --- | --- | --- | --- | --- | --- | --- | --- | --- |
| Recovery  /% | Precision/%R.S.D.  (intra-day/inter-day) | | Stability  /%R.S.D. | Recovery  /% | Precision/%R.S.D.  (intra-day/inter-day) | | Stability  /%R.S.D. | Recovery  /% | Precision/%R.S.D.  (intra-day/inter-day) | | Stability  /%R.S.D. |
| Instrumental | Repeatability | Instrumental | Repeatability | Instrumental | Repeatability |
| MF | 100.9 | 0.36(0.11)*/  0.52(0.19)* | 0.80(0.11)* /  1.45(0.20)* | 0.38(0.16) | 101.5 | 0.19(0.16) /  0.38(0.19) | 0.41(0.17) /  0.95(0.19) | 0.23(0.18) | 102.6 | 0.15(0.10) /  0.36(0.11) | 0.55(0.11) /  0.99(0.14) | 0.18(0.13) |
| BF | 99.31 | 0.72(0.15)/  1.08(0.17) | 0.77(0.14)/  1.66(0.16) | 1.28(0.15) | 100.5 | 0.74(0.13) /  0.88(0.15) | 0.72(0.12) /  1.30(0.14) | 1.15(0.12) | 98.60 | 0.80(0.11) /  0.95(0.12) | 0.86(0.12) /  1.17(0.13) | 0.99(0.12) |
| PHF | 99.67 | 0.21(0.09)/  0.49(0.10) | 0.55(0.10)/  0.83(0.11) | 0.25(0.11) | 101.0 | 0.18(0.09) /  0.54(0.10) | 0.52(0.10) /  0.77(0.12) | 0.20(0.11) | 99.20 | 0.19(0.11) /  0.42(0.15) | 0.32(0.10) /  0.83(0.13) | 0.30(0.12) |
| RGZ | 99.38 | 0.38(0.08)/  0.49(0.09) | 0.75(0.07)/  0.82 (0.08) | 0.39(0.09) | 99.00 | 0.28(0.08) /  0.66(0.08) | 0.45(0.08) /  0.78(0.09) | 0.29(0.08) | 102.3 | 0.32(0.08) /  0.86(0.09) | 0.45(0.08) /  0.90 (0.08) | 0.42(0.09) |
| PGZ | 100.4 | 0.44(0.10)/  0.68(0.10) | 0.53(0.09)/  0.85(0.10) | 0.38(0.09) | 99.77 | 0.29(0.10) /  0.54(0.11) | 0.54(0.09) /  0.88(0.10) | 0.27(0.10) | 101.7 | 0.33(0.09) /  0.72(0.09) | 0.59(0.09) /  0.79(0.11) | 0.18(0.10) |
| CPM | 101.9 | 0.28(0.07)/  0.44(0.07) | 0.39(0.07)/  0.93(0.08) | 0.27(0.07) | 102.7 | 0.28(0.07) /  0.46(0.07) | 0.49 (0.07) /  0.90(0.08) | 0.30(0.07) | 99.80 | 0.29(0.07) /  0.58(0.07) | 0.55(0.07) /  0.95(0.09) | 0.24(0.08) |
| GPZ | 98.80 | 0.23(0.07)/  0.38(0.08) | 0.53(0.08)/  0.86(0.08) | 0.29(0.08) | 100.7 | 0.18(0.07) /  0.36(0.07) | 0.34(0.07) /  0.86(0.08) | 0.22(0.08) | 101.1 | 0.21(0.08) /  0.57(0.08) | 0.48(0.07) /  0.76(0.07) | 0.23(0.08) |
| TBM | 99.34 | 0.33(0.08)/  0.69(0.09) | 0.38(0.09)/  0.90(0.09) | 0.32(0.09) | 99.90 | 0.34(0.08) /  0.29(0.08) | 0.33(0.08) /  0.85(0.09) | 0.18(0.08) | 101.0 | 0.28(0.08) /  0.47(0.08) | 0.36(0.07) /  0.75(0.08) | 0.21(0.08) |
| GCZ | 101.4 | 0.24(0.08)/  0.80(0.09) | 0.44(0.07)  0.88(0.08) | 0.25(0.08) | 100.7 | 0.25(0.09) /  0.48(0.08) | 0.45(0.08) /  0.94(0.09) | 0.20(0.08) | 99.50 | 0.29(0.08) /  0.77(0.08) | 0.42(0.08) /  0.79(0.07) | 0.22(0.08) |
| GBM | 99.99 | 0.29(0.06)/  0.64(0.07) | 0.35(0.07)/  0.97(0.07) | 0.36(0.07) | 100.8 | 0.13(0.06) /  0.49(0.07) | 0.30(0.06) /  0.84(0.07) | 0.17(0.07) | 102.1 | 0.19(0.05) /  0.34(0.07) | 0.41(0.07) /  0.76(0.07) | 0.21(0.07) |
| GMR | 100.1 | 0.37(0.05)/ 0.43(0.06) | 0.44(0.05)/  1.31(0.06) | 0.40(0.06) | 99.20 | 0.23(0.04) /  0.69(0.06) | 0.36(0.04) /  1.24(0.06) | 0.33(0.05) | 99.15 | 0.19(0.05) /  0.38(0.06) | 0.45 (0.05) /  1.02 (0.07) | 0.27(0.05) |
| RGN | 98.76 | 0.34(0.05)/  0.90(0.05) | 0.56(0.05)/  0.50(0.06) | 0.22(0.05) | 99.89 | 0.20(0.05) /  0.81(0.04) | 0.37(0.04) /  0.80(0.05) | 0.20(0.04) | 101.1 | 0.34(0.05) /  0.63(0.06) | 0.43(0.06) /  0.55(0.06) | 0.19(0.06) |
| GQD | 102.0 | 0.24(0.05)/  0.39(0.06) | 0.47(0.04) /  0.86(0.05) | 0.19(0.04) | 100.9 | 0.37(0.04) /  0.32(0.05) | 0.44(0.04) /  0.69(0.05) | 0.21(0.04) | 98.92 | 0.34(0.05) /  0.39(0.05) | 0.27(0.04) /  0.86(0.04) | 0.16(0.05) |
| NGN | 98.21 | 0.36(0.04) /  0.82(0.05) | 0.68(0.04) /  1.83(0.04) | 0.45(0.05) | 99.90 | 0.28(0.04) /  0.38(0.04) | 0.51(0.05) /  1.48(0.06) | 0.35(0.05) | 101.9 | 0.30(0.04) /  0.31(0.05) | 0.56(0.05) /  0.93(0.05) | 0.43(0.05) |

*Values in brackets are the %R.S.D. values of retention times.

**Table S-4 Recovery, precision and stability data for fourteen analytes from tablet samples (n=6)**

| Analyte | 20 mg˙L-1 of standard spiked | | | | 100 mg˙L-1 of standard spiked | | | | 500 mg˙L-1 of standard spiked | | | |
| --- | --- | --- | --- | --- | --- | --- | --- | --- | --- | --- | --- | --- |
| Recovery  /% | Precision/%R.S.D.  (intra-day/inter-day) | | Stability  /%R.S.D. | Recovery  /% | Precision/%R.S.D.  (intra-day/inter-day) | | Stability  /%R.S.D. | Recovery  /% | Precision/%R.S.D.  (intra-day/inter-day) | | Stability  /%R.S.D. |
| Instrumental | Repeatability | Instrumental | Repeatability | Instrumental | Repeatability |
| MF | 100.4 | 0.19(0.12)*/  0.34(0.17)* | 0.42(0.11)* /  1.03(0.18)* | 0.21(0.15) | 99.68 | 0.17(0.13) /  0.30(0.16) | 0.33(0.15) /  0.89(0.17) | 0.17(0.16) | 101.3 | 0.15(0.12) /  0.37(0.12) | 0.41(0.11) /  0.91(0.14) | 0.19(0.14) |
| BF | 99.51 | 0.52(0.15)/  0.87(0.17) | 0.55(0.14)/  1.21(0.15) | 0.78(0.15) | 100.1 | 0.44(0.13) /  0.85(0.15) | 0.53(0.13) /  1.04(0.14) | 0.75(0.13) | 102.1 | 0.50(0.12) /  0.99(0.12) | 0.44(0.12) /  1.15(0.13) | 0.99(0.13) |
| PHF | 100.3 | 0.24(0.08)/  0.40(0.10) | 0.47(0.10)/  0.73(0.11) | 0.19(0.11) | 101.2 | 0.19(0.09) /  0.39(0.10) | 0.50(0.10) /  0.68(0.12) | 0.17(0.11) | 99.80 | 0.21(0.11) /  0.48(0.13) | 0.30(0.12) /  0.77(0.13) | 0.30(0.13) |
| RGZ | 99.70 | 0.20(0.08)/  0.49(0.09) | 0.47(0.07)/  0.80 (0.08) | 0.22(0.08) | 100.0 | 0.21(0.08) /  0.36(0.08) | 0.35(0.08) /  0.66(0.09) | 0.20(0.08) | 100.7 | 0.30(0.08) /  0.54(0.09) | 0.48(0.08) /  0.83 (0.08) | 0.42(0.08) |
| PGZ | 100.5 | 0.33(0.10)/  0.52(0.10) | 0.46(0.09)/  0.72(0.10) | 0.30(0.09) | 99.55 | 0.28(0.10) /  0.49(0.11) | 0.37(0.09) /  0.59(0.10) | 0.25(0.10) | 101.1 | 0.35(0.09) /  0.73(0.09) | 0.38(0.09) /  0.70(0.11) | 0.27(0.10) |
| CPM | 100.3 | 0.27(0.07)/  0.38(0.07) | 0.34(0.07)/  0.77(0.08) | 0.24(0.08) | 101.7 | 0.25(0.07) /  0.44(0.07) | 0.48 (0.07) /  0.93(0.08) | 0.29(0.08) | 100.1 | 0.26(0.07) /  0.52(0.07) | 0.58(0.07) /  0.82(0.08) | 0.29(0.08) |
| GPZ | 99.60 | 0.21(0.07)/  0.35(0.08) | 0.52(0.08)/  0.75(0.08) | 0.18(0.08) | 100.5 | 0.19(0.07) /  0.26(0.07) | 0.30(0.07) /  0.66(0.08) | 0.15(0.08) | 100.8 | 0.18(0.08) /  0.30(0.08) | 0.32(0.07) /  0.70(0.07) | 0.24(0.08) |
| TBM | 99.77 | 0.31(0.08)/  0.68(0.08) | 0.37(0.09)/  0.78(0.09) | 0.27(0.09) | 98.85 | 0.30(0.08) /  0.42(0.08) | 0.32(0.08) /  0.68(0.09) | 0.19(0.08) | 100.2 | 0.27(0.08) /  0.49(0.08) | 0.38(0.07) /  0.69(0.08) | 0.23(0.08) |
| GCZ | 101.7 | 0.20(0.08)/  0.83(0.08) | 0.42(0.07)  0.77(0.08) | 0.20(0.08) | 100.9 | 0.21(0.09) /  0.49(0.08) | 0.42(0.08) /  0.74(0.09) | 0.17(0.08) | 99.34 | 0.31(0.08) /  0.62(0.08) | 0.53(0.08) /  0.78(0.08) | 0.22(0.08) |
| GBM | 99.33 | 0.25(0.06)/  0.45(0.07) | 0.30(0.07)/  0.63(0.07) | 0.22(0.07) | 100.3 | 0.15(0.06) /  0.40(0.07) | 0.32(0.06) /  0.53(0.07) | 0.17(0.06) | 99.76 | 0.18(0.05) /  0.35(0.06) | 0.32(0.07) /  0.64(0.07) | 0.21(0.07) |
| GMR | 100.4 | 0.33(0.05)/ 0.40(0.06) | 0.32(0.05)/  0.83(0.06) | 0.21(0.06) | 99.10 | 0.21(0.05) /  0.45(0.06) | 0.30(0.05) /  0.81(0.06) | 0.24(0.05) | 100.3 | 0.28(0.05) /  0.48(0.06) | 0.52 (0.05) /  0.93 (0.07) | 0.30(0.05) |
| RGN | 99.18 | 0.31(0.05)/  0.88 (0.05) | 0.33(0.05)/  0.76(0.06) | 0.26(0.06) | 100.4 | 0.22(0.05) /  0.58(0.04) | 0.35(0.05) /  0.82(0.05) | 0.20(0.05) | 101.5 | 0.31(0.05) /  0.65(0.06) | 0.42(0.06) /  0.61(0.06) | 0.21(0.06) |
| GQD | 99.46 | 0.20(0.05)/  0.33(0.06) | 0.36(0.05) /  0.77(0.05) | 0.23(0.04) | 100.1 | 0.22(0.04) /  0.32(0.04) | 0.41(0.04) /  0.56(0.05) | 0.20(0.05) | 99.23 | 0.31(0.05) /  0.43(0.05) | 0.43(0.04) /  0.76(0.04) | 0.25(0.05) |
| NGN | 98.40 | 0.35(0.04) /  0.79(0.05) | 0.72(0.04) /  1.13(0.04) | 0.40(0.04) | 99.22 | 0.23(0.04) /  0.45(0.04) | 0.35(0.05) /  1.01(0.05) | 0.36(0.05) | 101.4 | 0.53(0.04) /  0.34(0.05) | 0.79(0.05) /  1.36(0.05) | 0.42(0.05) |

*Values in brackets are the %R.S.D. values of retention times.

**Table S-5 Recovery, precision and stability data for fourteen analytes from pill samples (n=6)**

| Analyte | 20 mg˙L-1 of standard spiked | | | | 100 mg˙L-1 of standard spiked | | | | 500 mg˙L-1 of standard spiked | | | |
| --- | --- | --- | --- | --- | --- | --- | --- | --- | --- | --- | --- | --- |
| Recovery  /% | Precision/%R.S.D.  (intra-day/inter-day) | | Stability  /%R.S.D. | Recovery  /% | Precision/%R.S.D.  (intra-day/inter-day) | | Stability  /%R.S.D. | Recovery  /% | Precision/%R.S.D.  (intra-day/inter-day) | | Stability  /%R.S.D. |
| Instrumental | Repeatability | Instrumental | Repeatability | Instrumental | Repeatability |
| MF | 98.35 | 0.32(0.15)*/  0.67(0.17)* | 0.55(0.12)* /  1.34(0.16)* | 0.25(0.14) | 99.88 | 0.22(0.12) /  0.45(0.14) | 0.33(0.14) /  1.11 (0.16) | 0.23(0.15) | 102.4 | 0.34(0.12) /  0.66(0.13) | 0.57(0.12) /  1.10(0.14) | 0.28(0.14) |
| BF | 98.82 | 0.55(0.15)/  0.77(0.16) | 0.89(0.15)/  1.33(0.15) | 0.89(0.15) | 99.79 | 0.41(0.14) /  0.88(0.15) | 0.68(0.13) /  1.55(0.14) | 0.71(0.13) | 101.5 | 0.53(0.12) /  0.92(0.12) | 0.67(0.12) /  1.70(0.13) | 0.94(0.12) |
| PHF | 99.67 | 0.32(0.09)/  0.48(0.10) | 0.49(0.11)/  0.93(0.11) | 0.30(0.10) | 100.7 | 0.28(0.09) /  0.38(0.10) | 0.39(0.10) /  0.78(0.12) | 0.27(0.11) | 99.21 | 0.35(0.12) /  0.68(0.13) | 0.55(0.12) /  0.97(0.13) | 0.30(0.13) |
| RGZ | 101.1 | 0.27(0.09)/  0.53(0.09) | 0.67(0.08)/  0.95(0.08) | 0.21(0.09) | 100.4 | 0.25(0.08) /  0.37(0.08) | 0.53(0.08) /  0.78(0.09) | 0.19(0.09) | 101.4 | 0.28(0.08) /  0.59(0.09) | 0.87(0.08) /  0.57 (0.08) | 0.32(0.08) |
| PGZ | 100.5 | 0.38(0.10)/  0.64(0.10) | 0.50(0.09)/  0.87(0.10) | 0.32(0.10) | 99.36 | 0.29(0.10) /  0.66(0.11) | 0.52(0.09) /  0.96(0.10) | 0.28(0.10) | 101.8 | 0.39(0.09) /  0.77(0.09) | 0.69(0.09) /  0.73(0.11) | 0.35(0.10) |
| CPM | 100.9 | 0.34(0.07)/  0.43(0.07) | 0.47(0.07)/  0.79(0.08) | 0.26(0.08) | 101.5 | 0.39(0.07) /  0.32(0.07) | 0.56 (0.07) /  0.98(0.08) | 0.28(0.07) | 100.4 | 0.59(0.07) /  0.54(0.07) | 0.57(0.07) /  0.91(0.08) | 0.25(0.08) |
| GPZ | 98.77 | 0.26(0.08)/  0.47(0.08) | 0.65(0.08)/  0.62(0.08) | 0.21(0.08) | 100.1 | 0.16(0.07) /  0.57(0.08) | 0.49(0.07) /  0.86(0.08) | 0.19(0.08) | 98.31 | 0.31(0.08) /  0.42(0.08) | 0.77(0.07) /  0.82(0.07) | 0.23(0.08) |
| TBM | 99.09 | 0.36(0.08)/  0.75(0.08) | 0.44(0.09)/  0.79(0.09) | 0.29(0.09) | 98.33 | 0.38 (0.08) /  0.72(0.08) | 0.42(0.08) /  0.88(0.09) | 0.27(0.08) | 101.4 | 0.29(0.08) /  0.55(0.08) | 0.48(0.08) /  0.73(0.08) | 0.25(0.08) |
| GCZ | 101.5 | 0.28(0.08)/  0.85(0.08) | 0.47(0.07)  0.87(0.08) | 0.22(0.08) | 100.4 | 0.26(0.09) /  0.55(0.09) | 0.58(0.08) /  0.79(0.09) | 0.18(0.09) | 99.58 | 0.30(0.08) /  0.72(0.08) | 0.55(0.08) /  0.98(0.08) | 0.29(0.08) |
| GBM | 99.90 | 0.28(0.07)/  0.62(0.07) | 0.38(0.07)/  0.84(0.07) | 0.24(0.07) | 100.8 | 0.19(0.07) /  0.80(0.07) | 0.72(0.06) /  0.63(0.07) | 0.18(0.06) | 99.30 | 0.20(0.05) /  0.65(0.06) | 0.72(0.07) /  0.94(0.07) | 0.32(0.07) |
| GMR | 101.3 | 0.31(0.06)/ 0.59(0.06) | 0.39(0.05)/  0.88(0.06) | 0.23(0.06) | 99.00 | 0.26(0.05) /  0.58(0.06) | 0.40(0.05) /  0.85(0.06) | 0.20(0.06) | 100.9 | 0.24(0.05) /  0.78(0.06) | 0.59 (0.05) /  0.66 (0.07) | 0.31(0.07) |
| RGN | 99.44 | 0.43(0.05)/  0.55 (0.05) | 0.58(0.05)/  0.75(0.06) | 0.24(0.06) | 100.8 | 0.21(0.05) /  0.57(0.04) | 0.65(0.05) /  0.89(0.05) | 0.21(0.05) | 101.9 | 0.44(0.06) /  0.75(0.06) | 0.47(0.06) /  0.81(0.06) | 0.27(0.06) |
| GQD | 99.02 | 0.25(0.06)/  0.57(0.06) | 0.80(0.06) /  0.71(0.05) | 0.26(0.05) | 100.4 | 0.27(0.04) /  0.72(0.04) | 0.56(0.04) /  0.57(0.05) | 0.22(0.04) | 99.77 | 0.38(0.05) /  0.93(0.05) | 0.49(0.04) /  1.04(0.04) | 0.27(0.05) |
| NGN | 97.66 | 0.49(0.04) /  0.93(0.05) | 0.81(0.04) /  1.83(0.05) | 0.44(0.05) | 98.32 | 0.36(0.04) /  0.58(0.04) | 0.69(0.05) /  1.31(0.05) | 0.34(0.05) | 100.1 | 0.56(0.04) /  0.74(0.05) | 0.88(0.05) /  1.76(0.05) | 0.43(0.05) |

*Values in brackets are the %R.S.D. values of retention times.
